# Supplementary material for: Prioritization of the Skills to Be Mastered for the Daily Jobs of Japanese Dental Hygienists
Source: Int J Dent. 2020 Jun 22;2020:4297646. doi: 10.1155/2020/4297646 (PMC7327552; doi:10.1155/2020/4297646)
Supplement: Supplementary Materials — Table S1: frequencies and item response analysis results of the seventy seven daily jobs of dental hygienists. Table S2: cross tabulations of the work-related tasks by working style and age group. Table S3: results of factor analysis of seventy seven work-related tasks. Figure S1: item response curve and item information curve for seventy-seven items. Figure S2: the mean values of ability of each cluster with respect to age groups. Figure S3: the mean values of ability of each cluster with respect to employment status (full time or part time). [file 4297646.f1.zip]

Archive with 4 entries (4 files):
- 4297646.f1/Additinal file 1 S1 Table S2 Table S3 Table.docx
- 4297646.f1/Additional file 3 S2 Figuer .pptx
- 4297646.f1/Additional file 4 S3 Figuer .pptx
- 4297646.f1/Additonal file 2 S1 Figuer .pptx
